# Supplementary material
Source: publisher site journal article supplement (https://www.dovepress.com/article/457617)
Supplement: Supplementary file 1 [file 457617-revised-supplementary-file-2.pdf › 457617-revised-supplementary-file-2.pdf]

| Radiation Safety             |                         |                                      |                                                                              |                                                                                                |                                                                      |
|------------------------------|-------------------------|--------------------------------------|------------------------------------------------------------------------------|------------------------------------------------------------------------------------------------|----------------------------------------------------------------------|
| Timestamp                    | Please select your role | Have you done laser safety training? | How many urological procedures using Holmium Laser have you participated in? | Eye damage can occur by looking into the "green light beam" even if the laser is not activated | Normal prescription glasses protect against laser induced eye damage |
| 2022/03/08 5:42:25 PM GMT+8  | Urology Resident        | No                                   | 6 to 20                                                                      | FALSE                                                                                          | TRUE                                                                 |
| 2022/03/10 10:27:54 AM GMT+8 | Urology Resident        | No                                   | 6 to 20                                                                      | FALSE                                                                                          | TRUE                                                                 |
| 2022/03/10 10:43:45 AM GMT+8 | Urology Consultant      | Yes                                  | More than 20                                                                 | TRUE                                                                                           | FALSE                                                                |
| 2022/03/10 3:29:49 PM GMT+8  | Theatre nurse           | Yes                                  | More than 20                                                                 | TRUE                                                                                           | FALSE                                                                |
| 2022/03/10 3:32:12 PM GMT+8  | Theatre nurse           | Yes                                  | More than 20                                                                 | FALSE                                                                                          | FALSE                                                                |
| 2022/03/10 3:41:01 PM GMT+8  | Anaesthetic Consultant  | Yes                                  | More than 20                                                                 | TRUE                                                                                           | FALSE                                                                |
| 2022/03/10 6:29:22 PM GMT+8  | Theatre nurse           | Yes                                  | More than 20                                                                 | TRUE                                                                                           | TRUE                                                                 |
| 2022/03/10 8:51:52 PM GMT+8  | Theatre nurse           | Yes                                  | More than 20                                                                 | FALSE                                                                                          | TRUE                                                                 |
| 2022/03/10 9:26:16 PM GMT+8  | Urology Consultant      | Yes                                  | More than 20                                                                 | FALSE                                                                                          | TRUE                                                                 |
| 2022/03/11 4:32:32 PM GMT+8  | Anaesthetic Registrar   | No                                   | More than 20                                                                 | TRUE                                                                                           | FALSE                                                                |
| 2022/03/14 8:21:10 AM GMT+8  | Anaesthetic Consultant  | No                                   | More than 20                                                                 | FALSE                                                                                          | FALSE                                                                |
| 2022/03/14 1:57:41 PM GMT+8  | Urology Registrar       | No                                   | More than 20                                                                 | FALSE                                                                                          | FALSE                                                                |
| 2022/03/14 3:07:09 PM GMT+8  | Urology Registrar       | Yes                                  | More than 20                                                                 | FALSE                                                                                          | TRUE                                                                 |
| 2022/03/15 1:19:17 PM GMT+8  | Urology Intern          | No                                   | 1 to 5                                                                       | TRUE                                                                                           | FALSE                                                                |
| 2022/03/15 2:02:22 PM GMT+8  | Theatre nurse           | Yes                                  | 1 to 5                                                                       | TRUE                                                                                           | FALSE                                                                |
| 2022/03/16 12:45:27 PM GMT+8 | Urology Consultant      | Yes                                  | More than 20                                                                 | FALSE                                                                                          | TRUE                                                                 |
| 2022/03/16 1:03:59 PM GMT+8  | Urology Consultant      | Yes                                  | More than 20                                                                 | FALSE                                                                                          | TRUE                                                                 |
| 2022/03/16 1:18:19 PM GMT+8  | Theatre nurse           | Yes                                  | More than 20                                                                 | TRUE                                                                                           | FALSE                                                                |
| 2022/03/18 2:01:33 PM GMT+8  | Anaesthetic Consultant  | No                                   | More than 20                                                                 | TRUE                                                                                           | FALSE                                                                |
| 2022/03/19 1:30:16 AM GMT+8  | Theatre nurse           | Yes                                  | None                                                                         | FALSE                                                                                          | FALSE                                                                |
| 2022/03/19 7:00:11 AM GMT+8  | Theatre nurse           | Yes                                  | 6 to 20                                                                      | TRUE                                                                                           | FALSE                                                                |
| 2022/03/19 7:46:49 AM GMT+8  | Theatre nurse           | Yes                                  | More than 20                                                                 | FALSE                                                                                          | FALSE                                                                |
| 2022/03/19 8:30:09 AM GMT+8  | Theatre nurse           | Yes                                  | 1 to 5                                                                       | TRUE                                                                                           | FALSE                                                                |
| 2022/03/19 3:21:33 PM GMT+8  | Theatre nurse           | Yes                                  | More than 20                                                                 | FALSE                                                                                          | TRUE                                                                 |
| 2022/03/20 12:26:15 AM GMT+8 | Urology Consultant      | No                                   | More than 20                                                                 | FALSE                                                                                          | TRUE                                                                 |
| 2022/03/24 10:19:50 AM GMT+8 | Theatre nurse           | Yes                                  | More than 20                                                                 | TRUE                                                                                           | FALSE                                                                |
| 2022/03/24 10:40:44 AM GMT+8 | Anaesthetic Consultant  | Yes                                  | More than 20                                                                 | FALSE                                                                                          | FALSE                                                                |
| 2022/04/06 2:57:16 PM GMT+8  | Theatre nurse           | Yes                                  | More than 20                                                                 | FALSE                                                                                          | FALSE                                                                |
| 2022/04/11 1:33:41 PM GMT+8  | Theatre nurse           | Yes                                  | 1 to 5                                                                       | FALSE                                                                                          | FALSE                                                                |
| 2022/04/11 3:12:51 PM GMT+8  | Intern                  | No                                   | None                                                                         | TRUE                                                                                           | FALSE                                                                |
| 2022/04/14 9:01:07 AM GMT+8  | Rep                     | Yes                                  | More than 20                                                                 | TRUE                                                                                           | FALSE                                                                |
| 2022/04/14 11:21:41 AM GMT+8 | Theatre nurse           | No                                   | None                                                                         | TRUE                                                                                           | FALSE                                                                |
| 2022/04/14 11:53:25 AM GMT+8 | Mit                     | No                                   | More than 20                                                                 | TRUE                                                                                           | FALSE                                                                |
| 2022/04/26 9:58:45 AM GMT+8  | Theatre nurse           | Yes                                  | 1 to 5                                                                       | FALSE                                                                                          | FALSE                                                                |
| 2022/04/26 10:22:53 AM GMT+8 | Anaesthetic Registrar   | No                                   | 1 to 5                                                                       | TRUE                                                                                           | FALSE                                                                |
| 2022/04/26 10:27:33 AM GMT+8 | Anaesthetic Registrar   | No                                   | None                                                                         | TRUE                                                                                           | FALSE                                                                |
| 2022/04/26 10:54:35 AM GMT+8 | Anaesthetic Registrar   | No                                   | None                                                                         | FALSE                                                                                          | FALSE                                                                |
| 2022/04/26 11:25:07 AM GMT+8 | Anaesthetic Registrar   | No                                   | 1 to 5                                                                       | TRUE                                                                                           | FALSE                                                                |
| 2022/04/26 12:15:43 PM GMT+8 | Anaesthetic Registrar   | No                                   | 1 to 5                                                                       | TRUE                                                                                           | FALSE                                                                |
| 2022/04/28 11:53:41 AM GMT+8 | Urology Registrar       | No                                   | 6 to 20                                                                      | FALSE                                                                                          | TRUE                                                                 |
| 2022/04/28 12:11:17 PM GMT+8 | Urology fellow          | No                                   | More than 20                                                                 | TRUE                                                                                           | FALSE                                                                |
| 2022/04/28 12:14:16 PM GMT+8 | Urology Registrar       | No                                   | 1 to 5                                                                       | FALSE                                                                                          | FALSE                                                                |
| 2022/04/28 12:17:08 PM GMT+8 | Urology Registrar       | No                                   | 6 to 20                                                                      | FALSE                                                                                          | TRUE                                                                 |
| 2022/04/28 12:27:31 PM GMT+8 | Urology Consultant      | Yes                                  | More than 20                                                                 | TRUE                                                                                           | TRUE                                                                 |
| 2022/04/29 11:38:59 AM GMT+8 | Urology Consultant      | Yes                                  | More than 20                                                                 | FALSE                                                                                          | TRUE                                                                 |
| 2022/04/29 11:42:41 AM GMT+8 | Urology Registrar       | Yes                                  | More than 20                                                                 | FALSE                                                                                          | TRUE                                                                 |
| 2022/04/29 11:50:58 AM GMT+8 | Urology Registrar       | Yes                                  | More than 20                                                                 | FALSE                                                                                          | FALSE                                                                |
| 2022/04/29 11:52:14 AM GMT+8 | Urology Registrar       | No                                   | More than 20                                                                 | FALSE                                                                                          | FALSE                                                                |
| 2022/04/29 12:18:59 PM GMT+8 | Urology Consultant      | Yes                                  | More than 20                                                                 | TRUE                                                                                           | TRUE                                                                 |
| 2022/04/29 5:10:03 PM GMT+8  | Urology Consultant      | Yes                                  | More than 20                                                                 | FALSE                                                                                          | FALSE                                                                |
| 2022/05/01 10:21:13 AM GMT+8 | Anaesthetic Registrar   | No                                   | None                                                                         | FALSE                                                                                          | FALSE                                                                |
| 2022/05/03 3:43:38 PM GMT+8  | Theatre nurse           | Yes                                  | More than 20                                                                 | FALSE                                                                                          | FALSE                                                                |
| 2022/05/13 9:23:13 AM GMT+8  | Anaesthesia RMO         | No                                   | 1 to 5                                                                       | TRUE                                                                                           | FALSE                                                                |
| 2022/05/19 8:30:40 PM GMT+8  | Urology Consultant      | Yes                                  | More than 20                                                                 | FALSE                                                                                          | FALSE                                                                |
| 2022/11/15 8:43:40 AM GMT+8  | Rmo                     | No                                   | 6 to 20                                                                      | FALSE                                                                                          | FALSE                                                                |
| 2022/11/15 11:56:32 AM GMT+8 | Urology Consultant      | Yes                                  | More than 20                                                                 | TRUE                                                                                           | FALSE                                                                |
| 2023/02/13 10:41:30 AM GMT+8 | Urology Registrar       | No                                   | More than 20                                                                 | FALSE                                                                                          | TRUE                                                                 |
| 2023/02/13 11:48:03 AM GMT+8 | Theatre nurse           | Yes                                  | More than 20                                                                 | TRUE                                                                                           | FALSE                                                                |

| If the laser fibre is activated and there is no intervening barrier (no fluid or solid), what is the minimum distance to avoid injury? | Do you find that the laser protection glasses impair your vision ? | Based on the hazard posed by holmium laser, how would you classify the current laser safety requirements? |
|----------------------------------------------------------------------------------------------------------------------------------------|--------------------------------------------------------------------|-----------------------------------------------------------------------------------------------------------|
| 5cm                                                                                                                                    | Yes                                                                | Excessive                                                                                                 |
| 5cm                                                                                                                                    | Yes                                                                | Excessive                                                                                                 |
| 0.4cm                                                                                                                                  | Yes                                                                | Adequate                                                                                                  |
| 5cm                                                                                                                                    | Yes                                                                | Adequate                                                                                                  |
| 5cm                                                                                                                                    | Yes                                                                | Excessive                                                                                                 |
| 5cm                                                                                                                                    | Yes                                                                | Insufficient                                                                                              |
| 5cm                                                                                                                                    | Yes                                                                | Excessive                                                                                                 |
| 5cm                                                                                                                                    | Yes                                                                | Excessive                                                                                                 |
| 0.4cm                                                                                                                                  | Yes                                                                | Excessive                                                                                                 |
| 1m                                                                                                                                     | Yes                                                                | Adequate                                                                                                  |
| 1m                                                                                                                                     | Yes                                                                | Excessive                                                                                                 |
| 5cm                                                                                                                                    | Yes                                                                | Excessive                                                                                                 |
| 0.4cm                                                                                                                                  | Yes                                                                | Excessive                                                                                                 |
| 1m                                                                                                                                     | No                                                                 | Adequate                                                                                                  |
| 5cm                                                                                                                                    | Yes                                                                | Excessive                                                                                                 |
| 0.4cm                                                                                                                                  | Yes                                                                | Excessive                                                                                                 |
| 0.4cm                                                                                                                                  | Yes                                                                | Excessive                                                                                                 |
| 1m                                                                                                                                     | No                                                                 | Insufficient                                                                                              |
| 1m                                                                                                                                     | Yes                                                                | Adequate                                                                                                  |
| 1m                                                                                                                                     | No                                                                 | Adequate                                                                                                  |
| 5cm                                                                                                                                    | Yes                                                                | Adequate                                                                                                  |
| 1m                                                                                                                                     | No                                                                 | Excessive                                                                                                 |
| 1m                                                                                                                                     | Yes                                                                | Adequate                                                                                                  |
| 5cm                                                                                                                                    | No                                                                 | Adequate                                                                                                  |
| 30cm                                                                                                                                   | Yes                                                                | Excessive                                                                                                 |
| 5cm                                                                                                                                    | Yes                                                                | Adequate                                                                                                  |
| 1m                                                                                                                                     | No                                                                 | Adequate                                                                                                  |
| 30cm                                                                                                                                   | Yes                                                                | Adequate                                                                                                  |
| 5m                                                                                                                                     | Yes                                                                | Adequate                                                                                                  |
| 1m                                                                                                                                     | Yes                                                                | Adequate                                                                                                  |
| 0.4cm                                                                                                                                  | No                                                                 | Adequate                                                                                                  |
| 1m                                                                                                                                     | Yes                                                                | Adequate                                                                                                  |
| 5m                                                                                                                                     | Yes                                                                | Adequate                                                                                                  |
| 5m                                                                                                                                     | Yes                                                                | Excessive                                                                                                 |
| 5m                                                                                                                                     | No                                                                 | Adequate                                                                                                  |
| 30cm                                                                                                                                   | No                                                                 | Insufficient                                                                                              |
| 1m                                                                                                                                     | Yes                                                                | Insufficient                                                                                              |
| 5cm                                                                                                                                    | Yes                                                                | Adequate                                                                                                  |
| 5cm                                                                                                                                    | Yes                                                                | Adequate                                                                                                  |
| 0.4cm                                                                                                                                  | Yes                                                                | Adequate                                                                                                  |
| 1m                                                                                                                                     | Yes                                                                | Adequate                                                                                                  |
| 5cm                                                                                                                                    | Yes                                                                | Adequate                                                                                                  |
| 5cm                                                                                                                                    | Yes                                                                | Excessive                                                                                                 |
| 5cm                                                                                                                                    | Yes                                                                | Excessive                                                                                                 |
| 30cm                                                                                                                                   | Yes                                                                | Excessive                                                                                                 |
| 5cm                                                                                                                                    | Yes                                                                | Excessive                                                                                                 |
| 0.4cm                                                                                                                                  | Yes                                                                | Adequate                                                                                                  |
| 5cm                                                                                                                                    | No                                                                 | Adequate                                                                                                  |
| 5cm                                                                                                                                    | No                                                                 | Excessive                                                                                                 |
| 1m                                                                                                                                     | No                                                                 | Adequate                                                                                                  |
| 1m                                                                                                                                     | Yes                                                                | Insufficient                                                                                              |
| 30cm                                                                                                                                   | No                                                                 | Adequate                                                                                                  |
| 1m                                                                                                                                     | No                                                                 | Adequate                                                                                                  |
| 5cm                                                                                                                                    | Yes                                                                | Excessive                                                                                                 |
| 5cm                                                                                                                                    | Yes                                                                | Adequate                                                                                                  |
| 0.4cm                                                                                                                                  | Yes                                                                | Excessive                                                                                                 |
| 0.4cm                                                                                                                                  | Yes                                                                | Excessive                                                                                                 |
| 1m                                                                                                                                     | Yes                                                                | Adequate                                                                                                  |
